# Supplementary material for: Liver Transcriptomic Profiles of Ruminant Species Fed Spent Hemp Biomass Containing Cannabinoids
Source: Preprints.org preprint supplement (doi:10.20944/preprints202407.0226.v1), 2024-07-02
Supplement: Supplementary file 1 [file supplementary]

**Supplementary Figures**


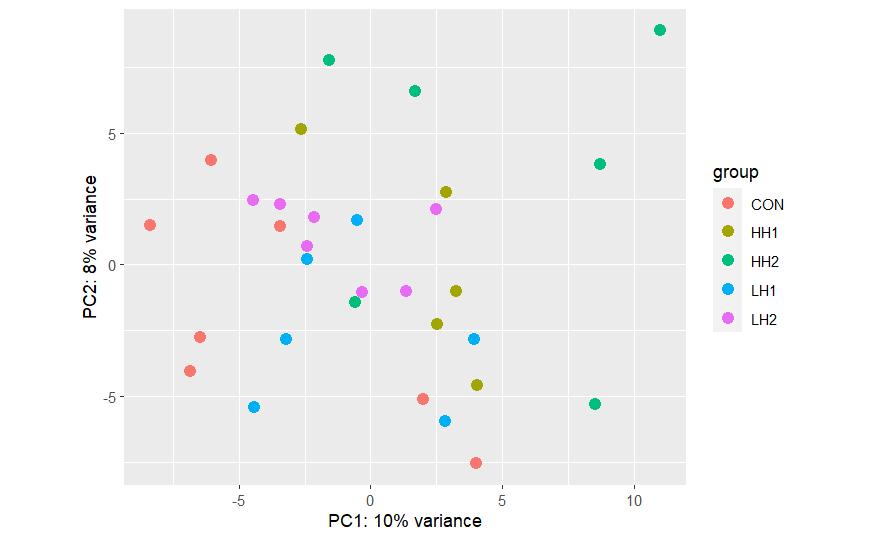

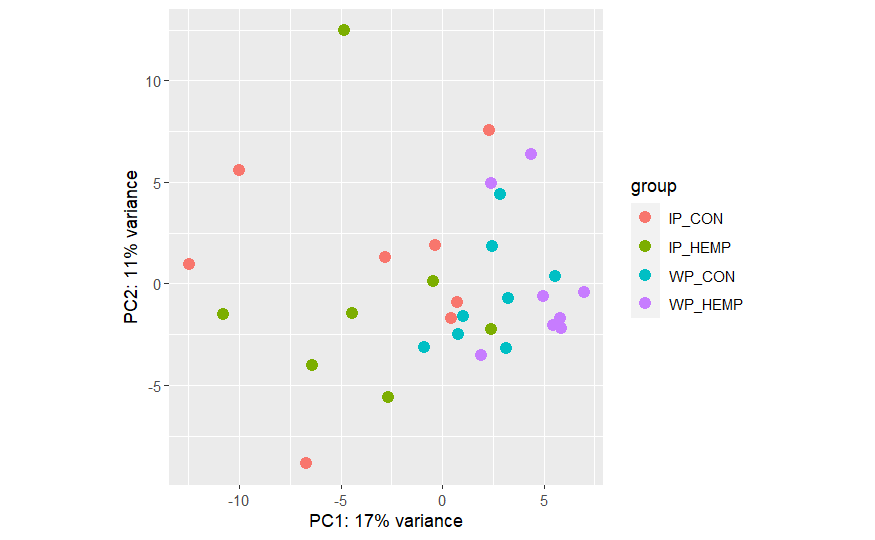


**A**

**B**

Figure S1. PCA plot of normalized value of gene expression matrix from dairy cows (A) and lambs (B)

Figure S2. Top-10 functional annotations of differentially expressed genes of dairy cows and lambs fed spent hemp biomass, analyzed using gene-set enrichment (GSE) analysis in ClusterProfiler R package.

Figure S3. GSEA most enriched KEGG pathways in dairy cows and lambs fed spent hemp biomass

.

Figure S4. Dynamic Impact Approach summary of Kyoto Encyclopedia of Genes and Genomes pathways of liver transcriptomic of dairy cows fed spent hemp biomass (SHB) or a control diet (CON) during the intervention (IP) or withdrawal (WP) period.

Figure S5. Top-10 impacted pathways of each comparison as highlighted by dynamic impact approach


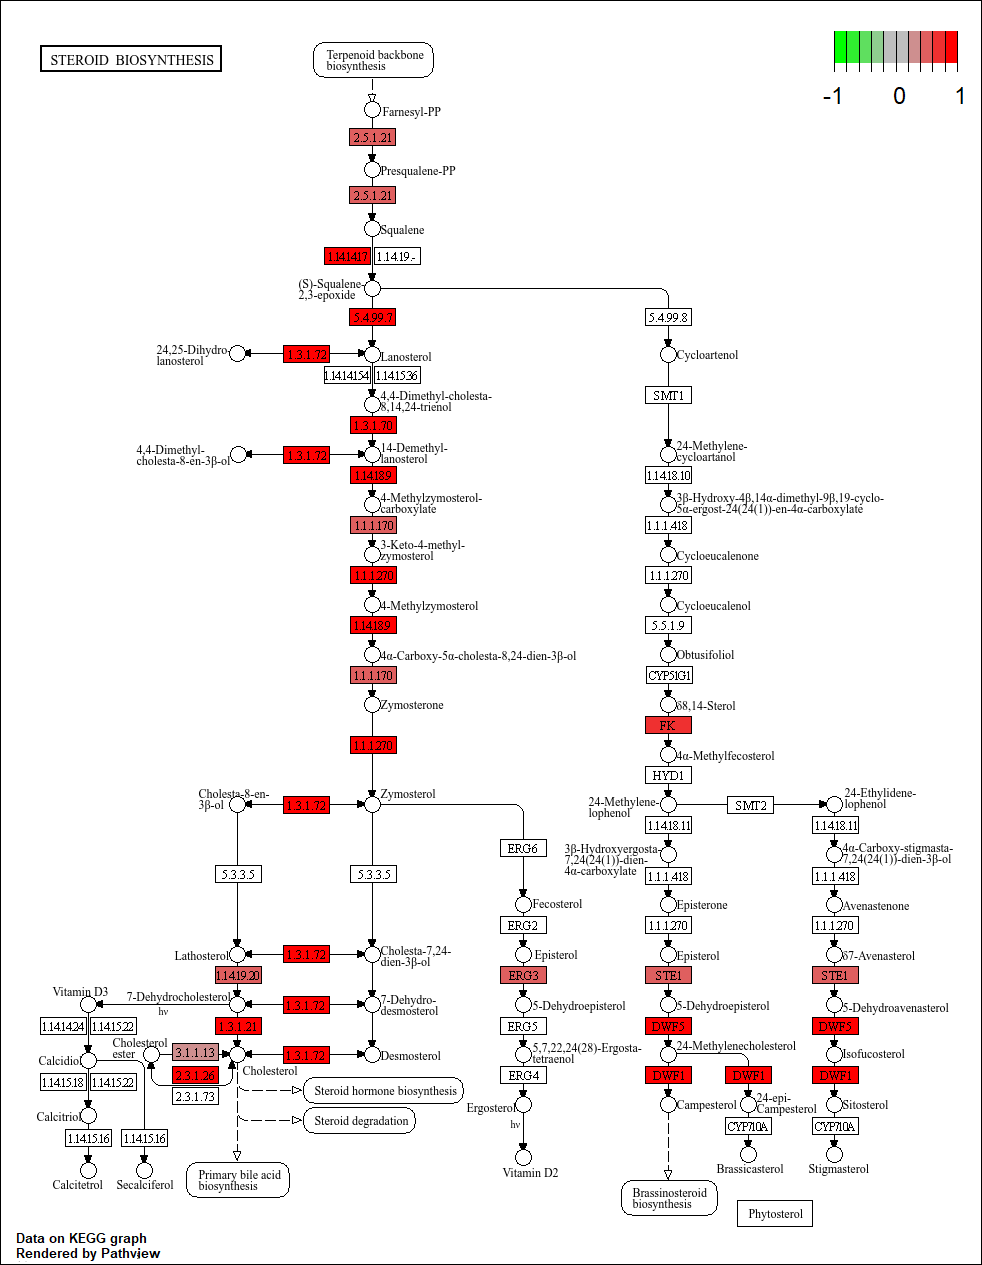


Figure S6. Steroid biosynthesis pathway affected by feeding spent hemp biomass in lambs (HH2 group)


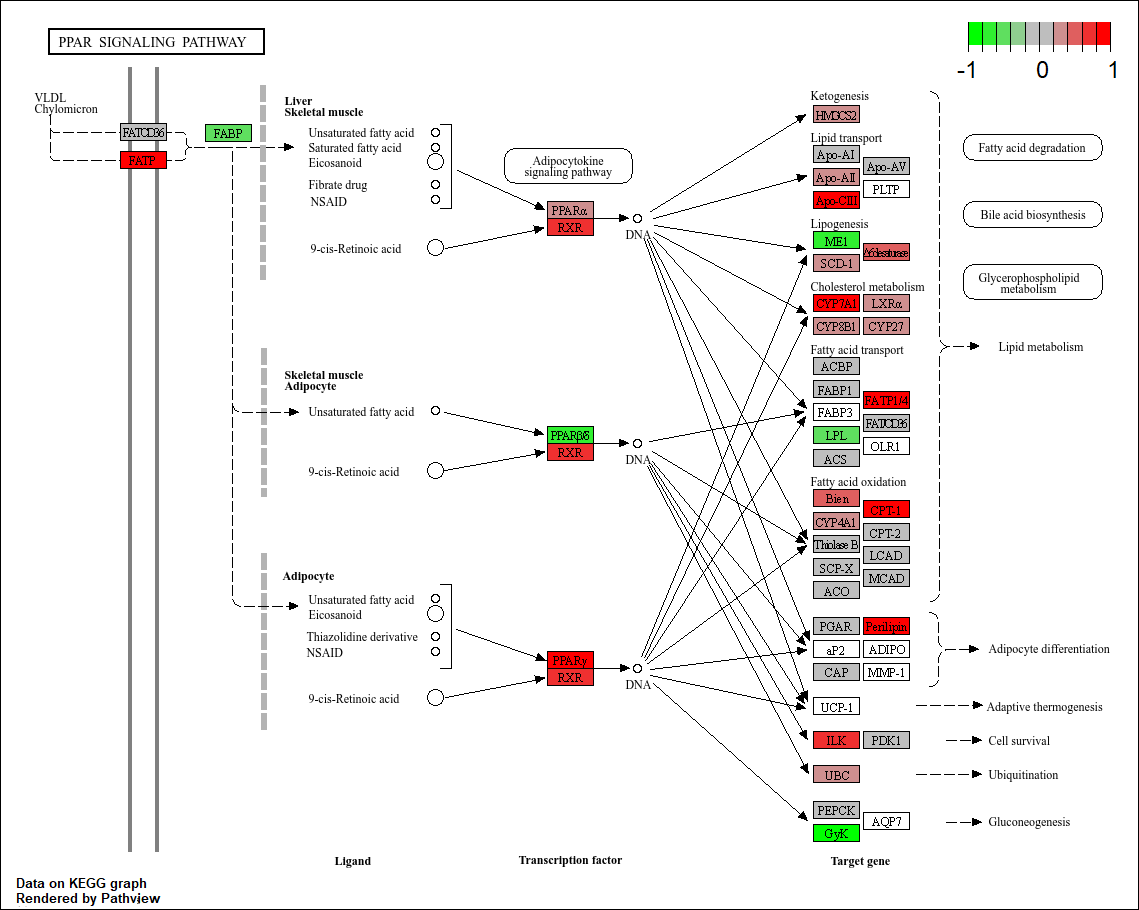


Figure S7. Effect on PPAR signaling pathway by feeding spent hemp biomass to dairy cows


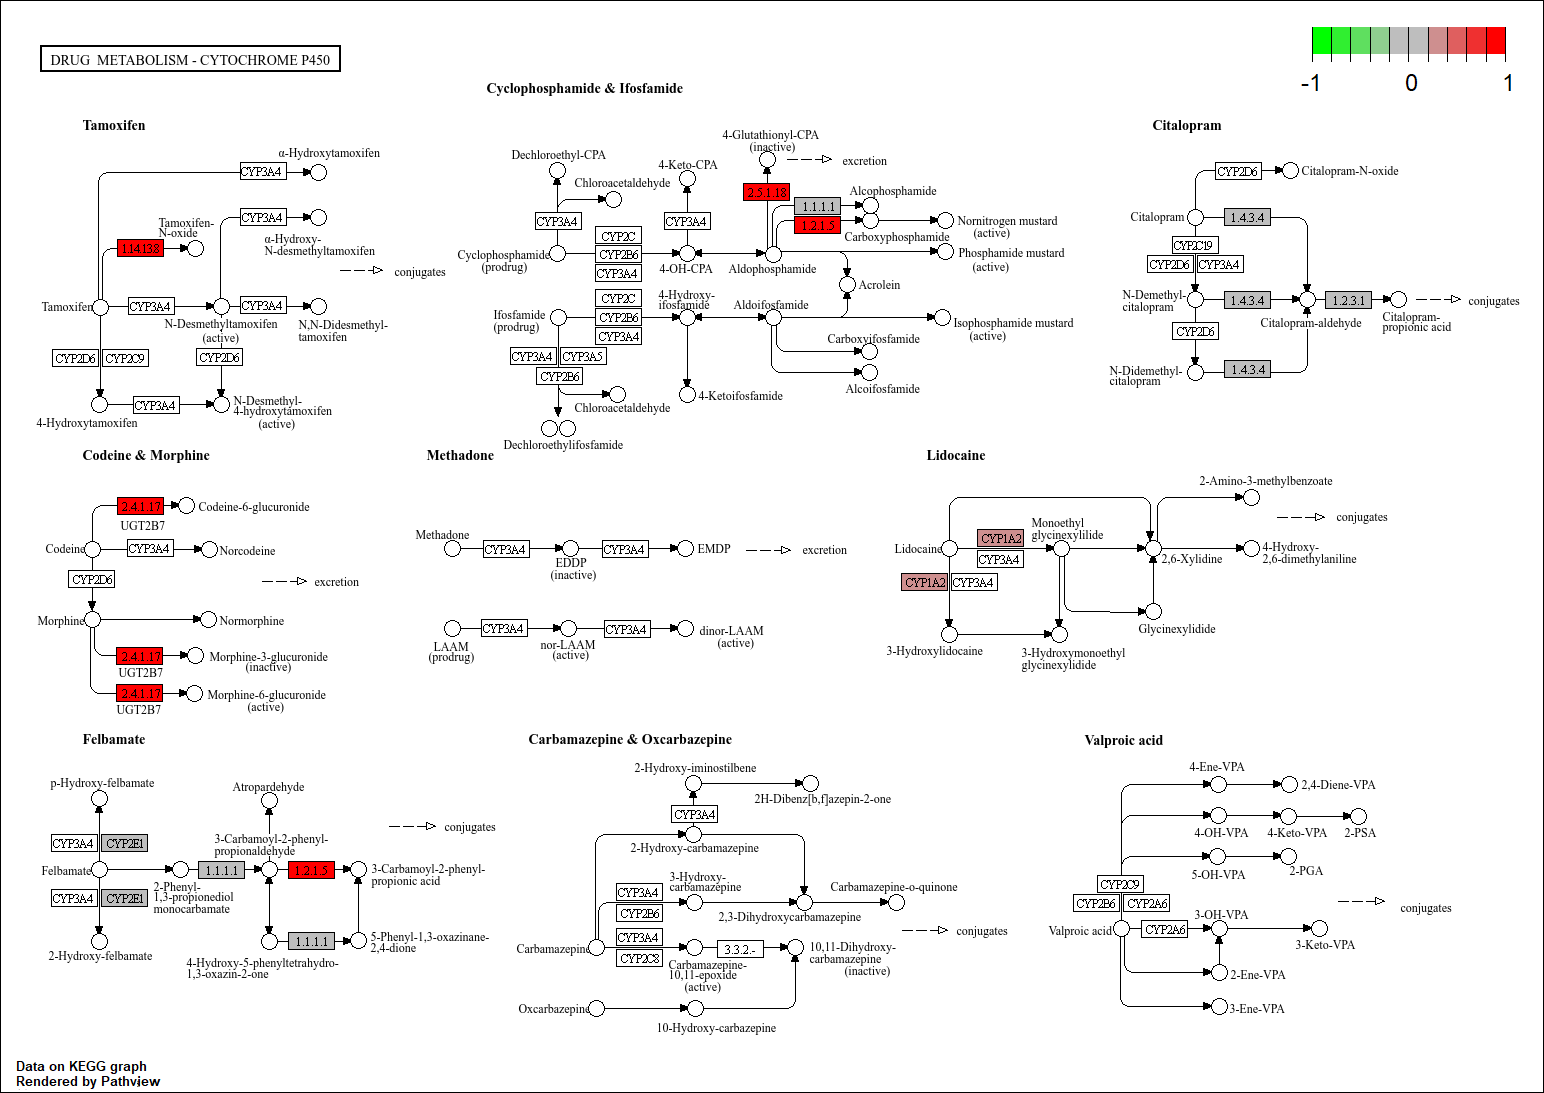


Figure S7. Modulation of drug metabolism related to cytochrome P450 pathway due to dietary spent hemp biomass fed to dairy cows


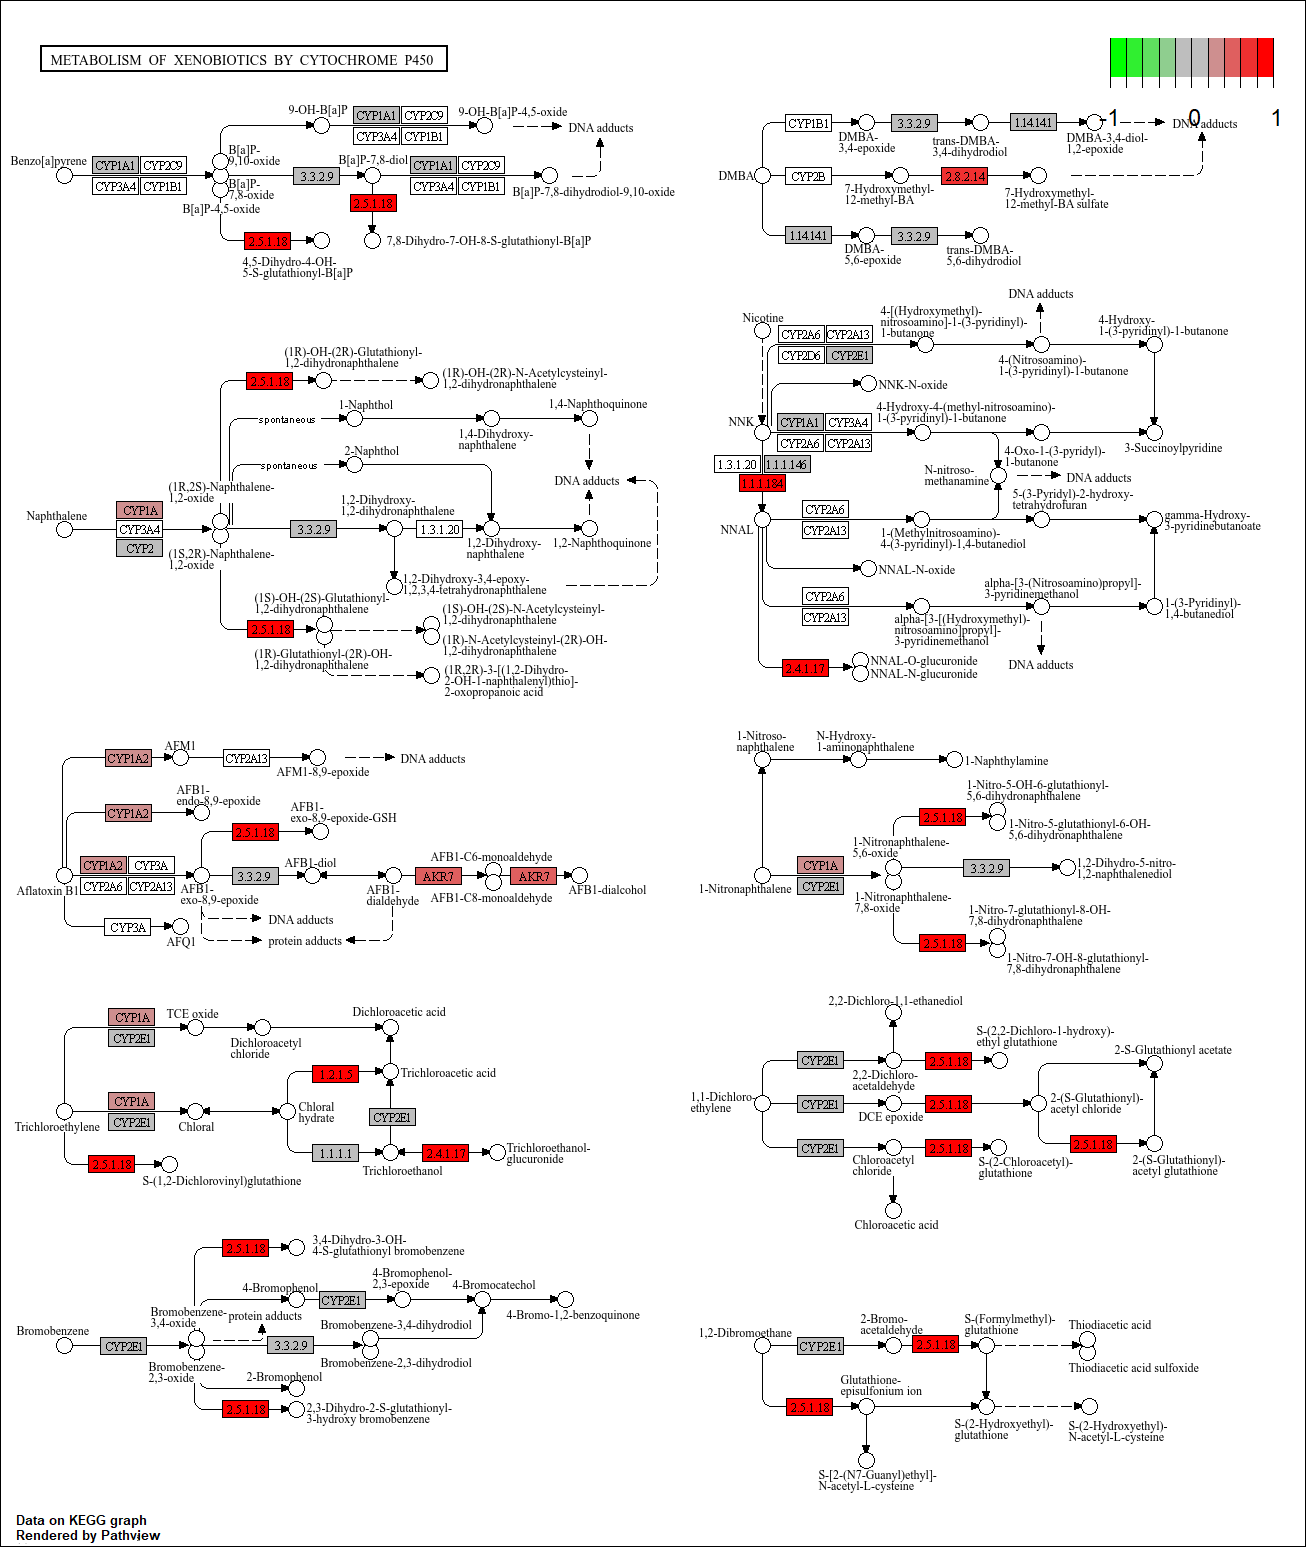


Figure S8. Modulation of metabolism of xenobiotics pathway by cytochrome P450 due to dietary spent hemp biomass fed to dairy cows


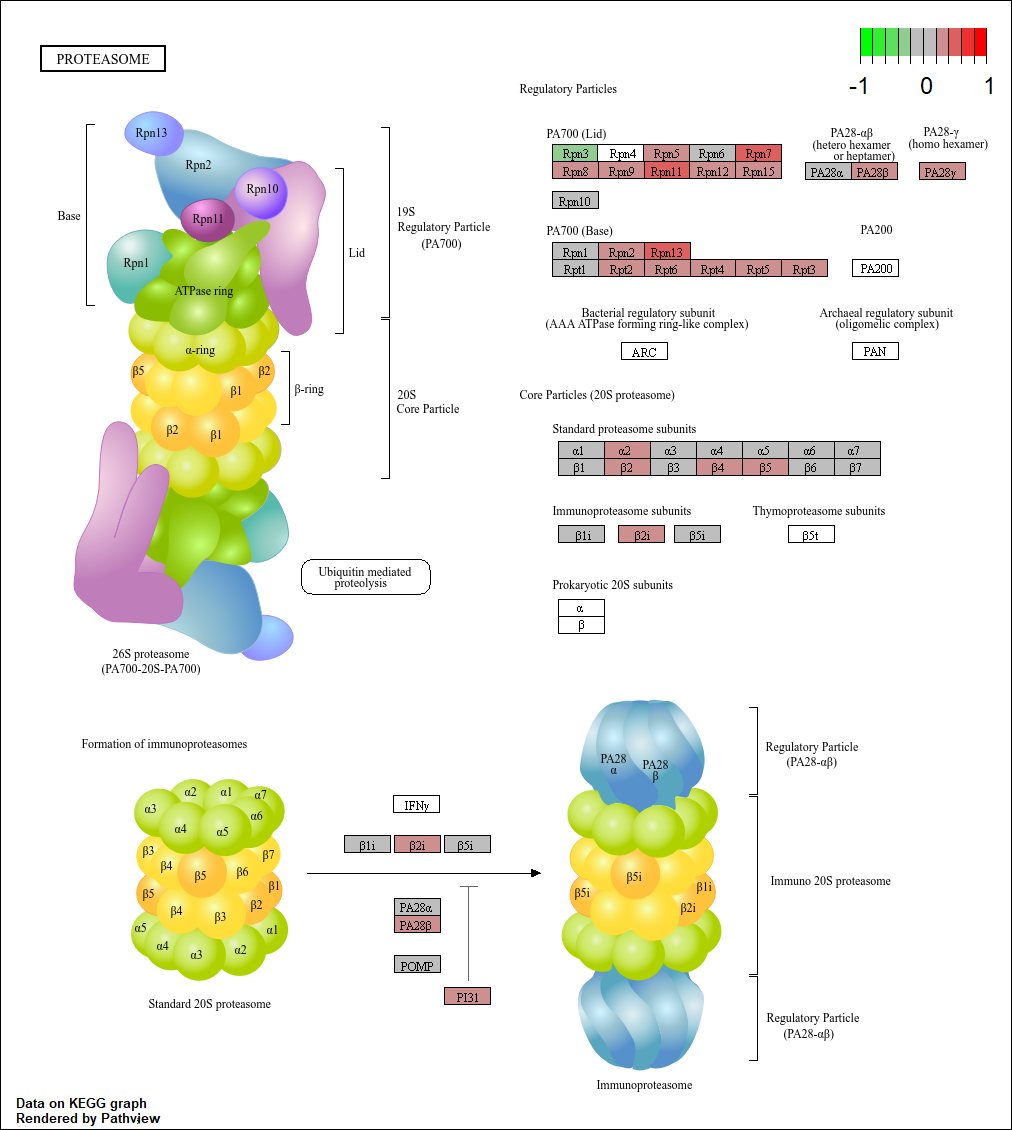


Figure S9. Peroxisome pathway affected by feeding spent hemp biomass in dairy cows
